# Supplementary material
Source: PubMed Central journal article supplement (PMC2048726)

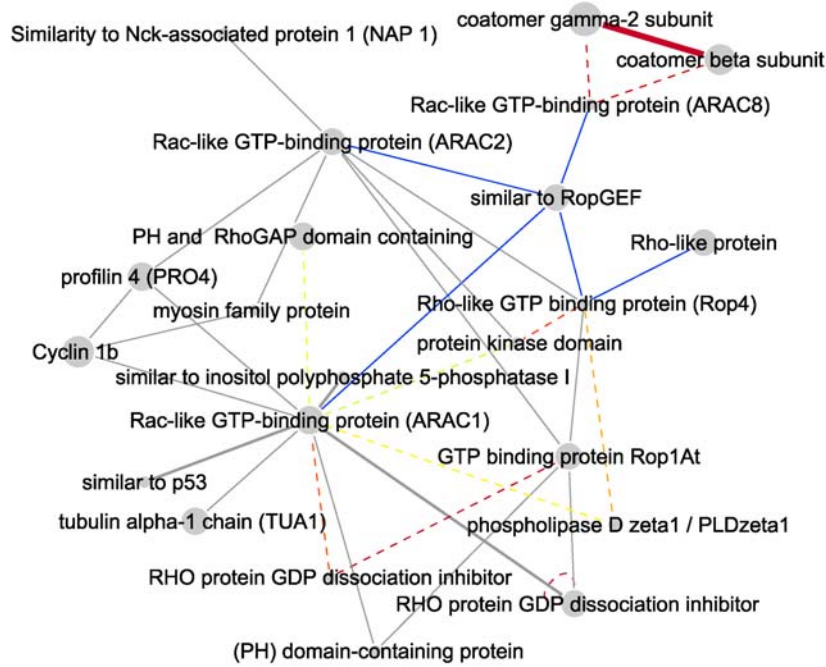

## Edges (interactions)

Thickness = CV    Color = co-expression

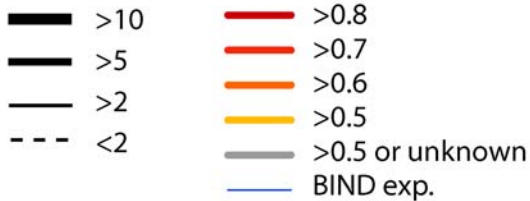

## Nodes (proteins)

Size = number of interactions

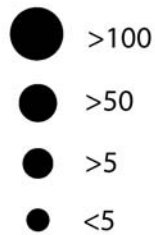

Color = Subcellular localization

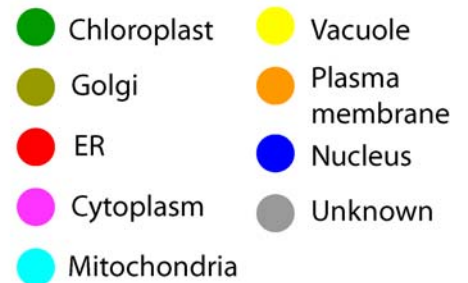

Supplement: plntphys_pp.107.103465v2_2.pdf [file plntphys_pp.107.103465v2_2.pdf]
