# Supplementary material
Source: PubMed Central journal article supplement (PMC2048726)

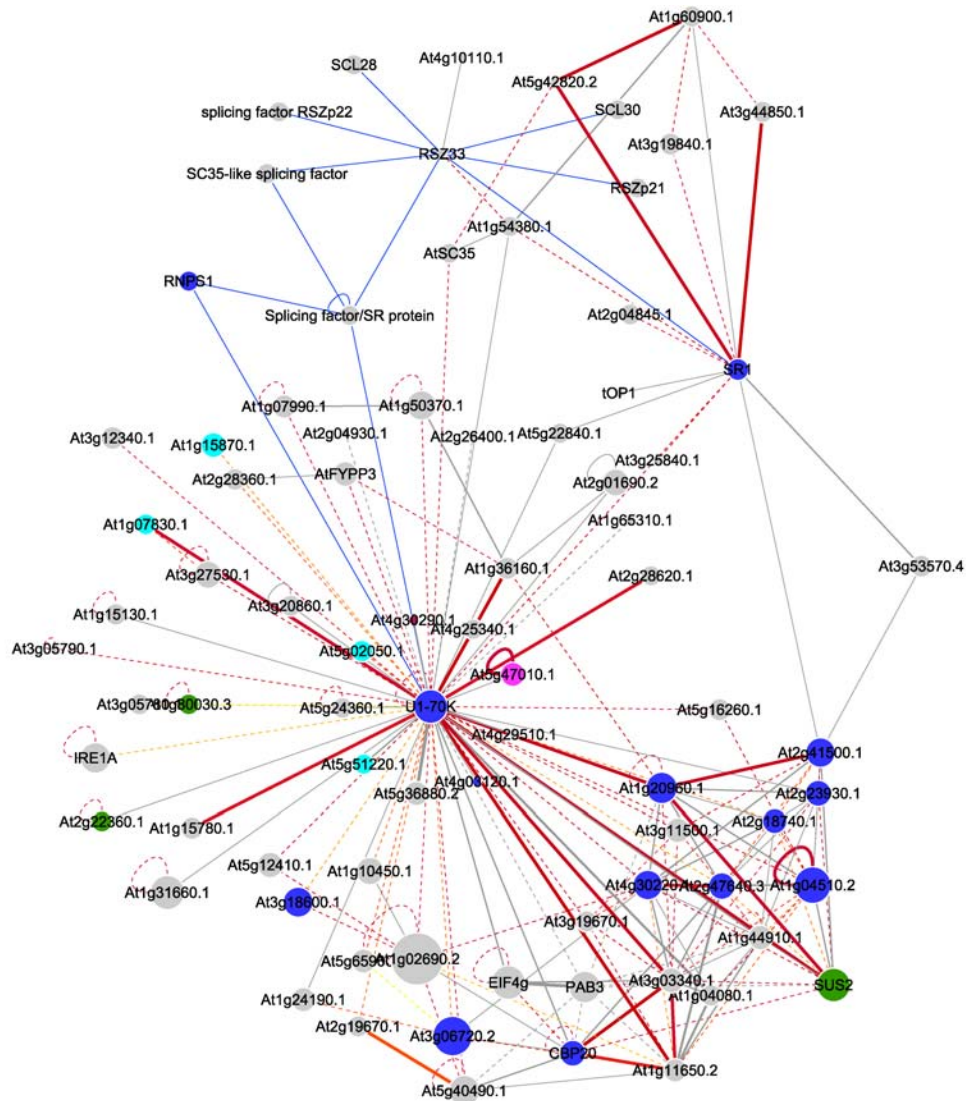

### Edges (interactions)

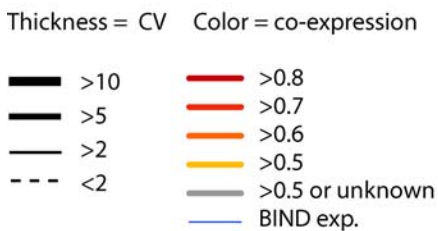

### Nodes (proteins)

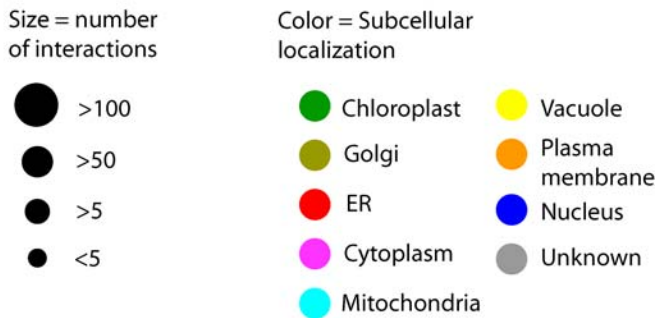

Supplement: plntphys_pp.107.103465v2_1.pdf [file plntphys_pp.107.103465v2_1.pdf]

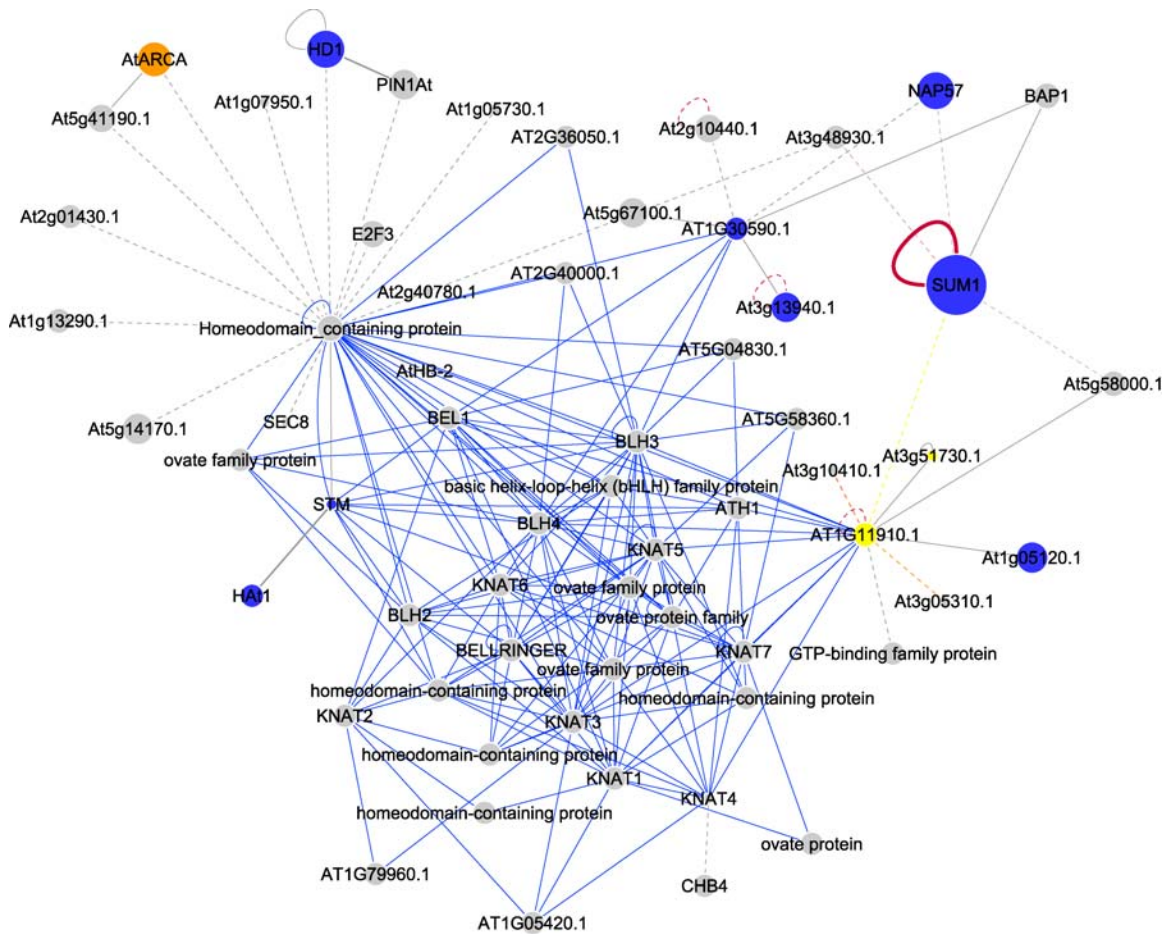

### Edges (interactions)

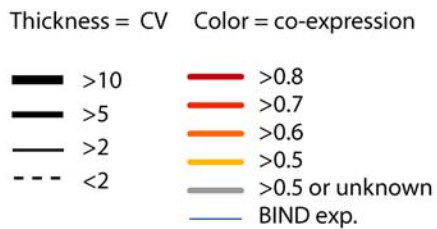

### Nodes (proteins)

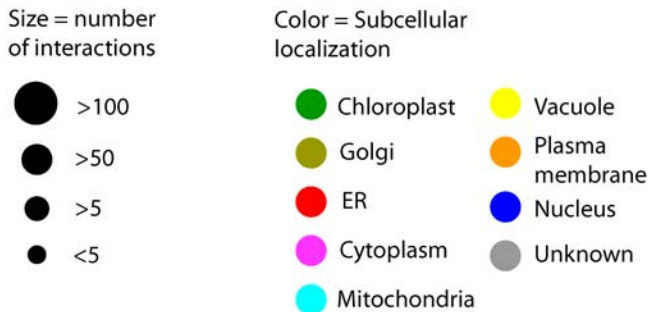

Supplement: plntphys_pp.107.103465v2_3.pdf [file plntphys_pp.107.103465v2_3.pdf]
